# Supplementary material for: Combined GWAS and Transcriptome Analyses Provide New Insights Into the Response Mechanisms of Sunflower Against Drought Stress
Source: Frontiers journal article supplement (doi:10.3389/fpls.2022.847435), 2022-05-03
Supplement: Data_Sheet_3.PDF [file Data_Sheet_3.PDF]

(A)

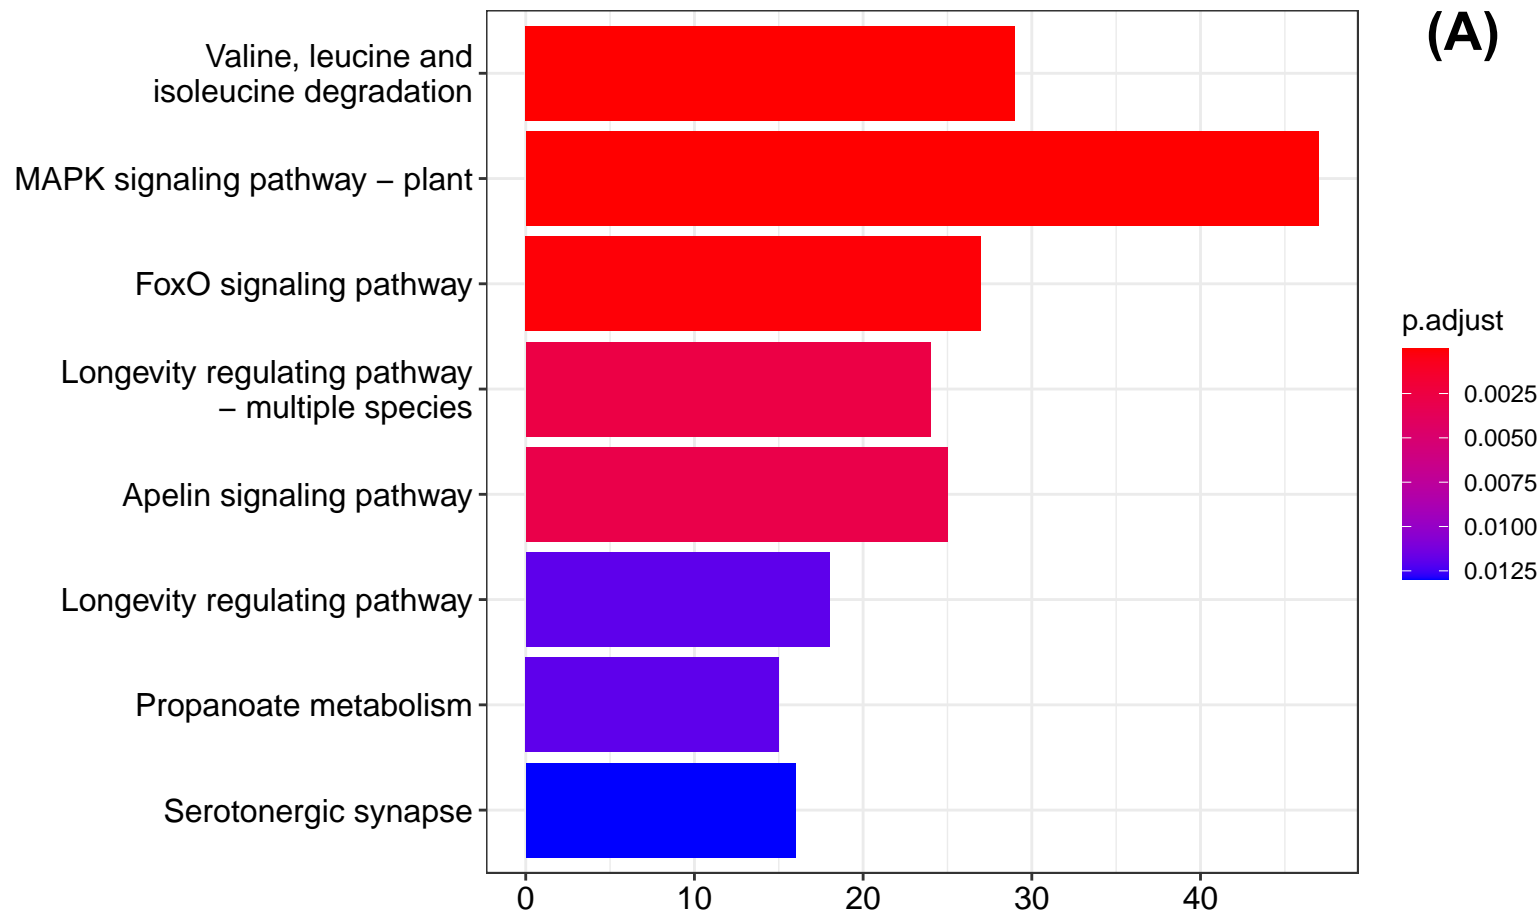

**(B)**

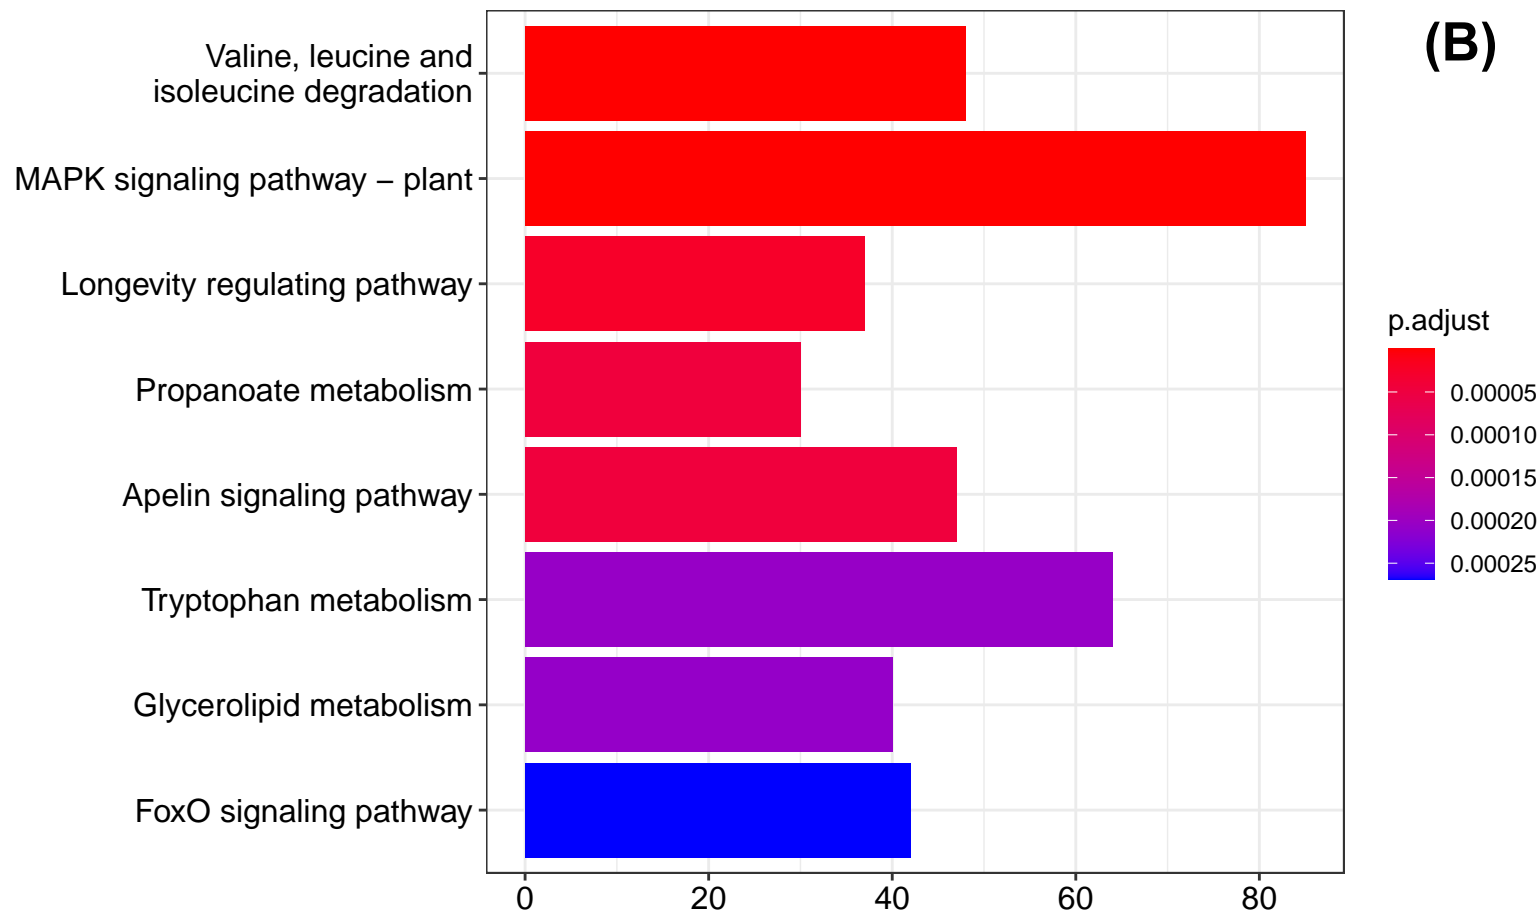

(C)

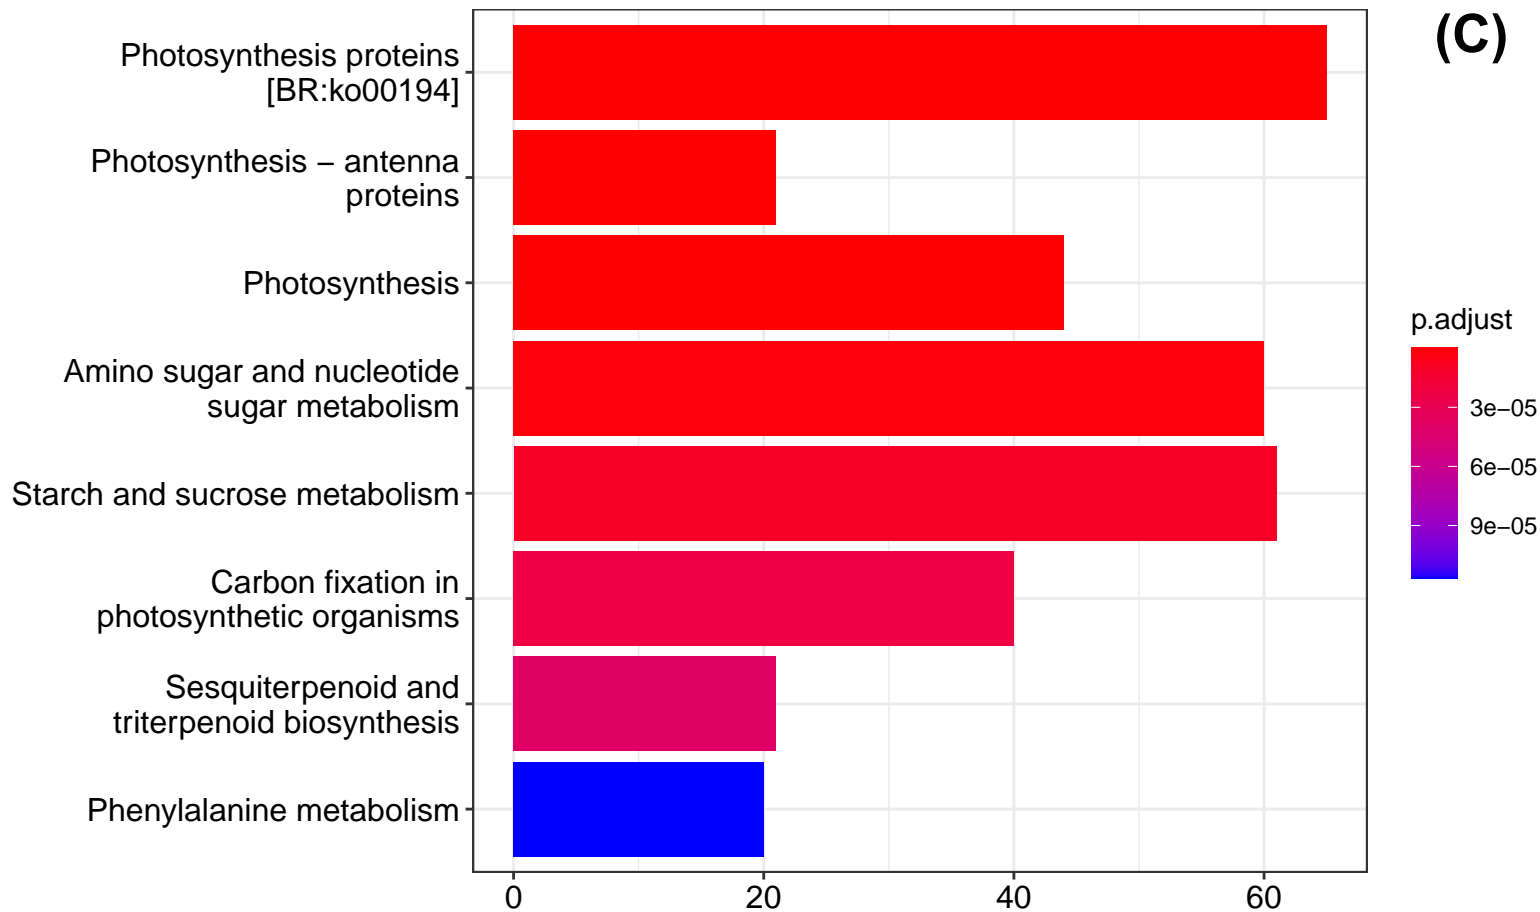

(D)

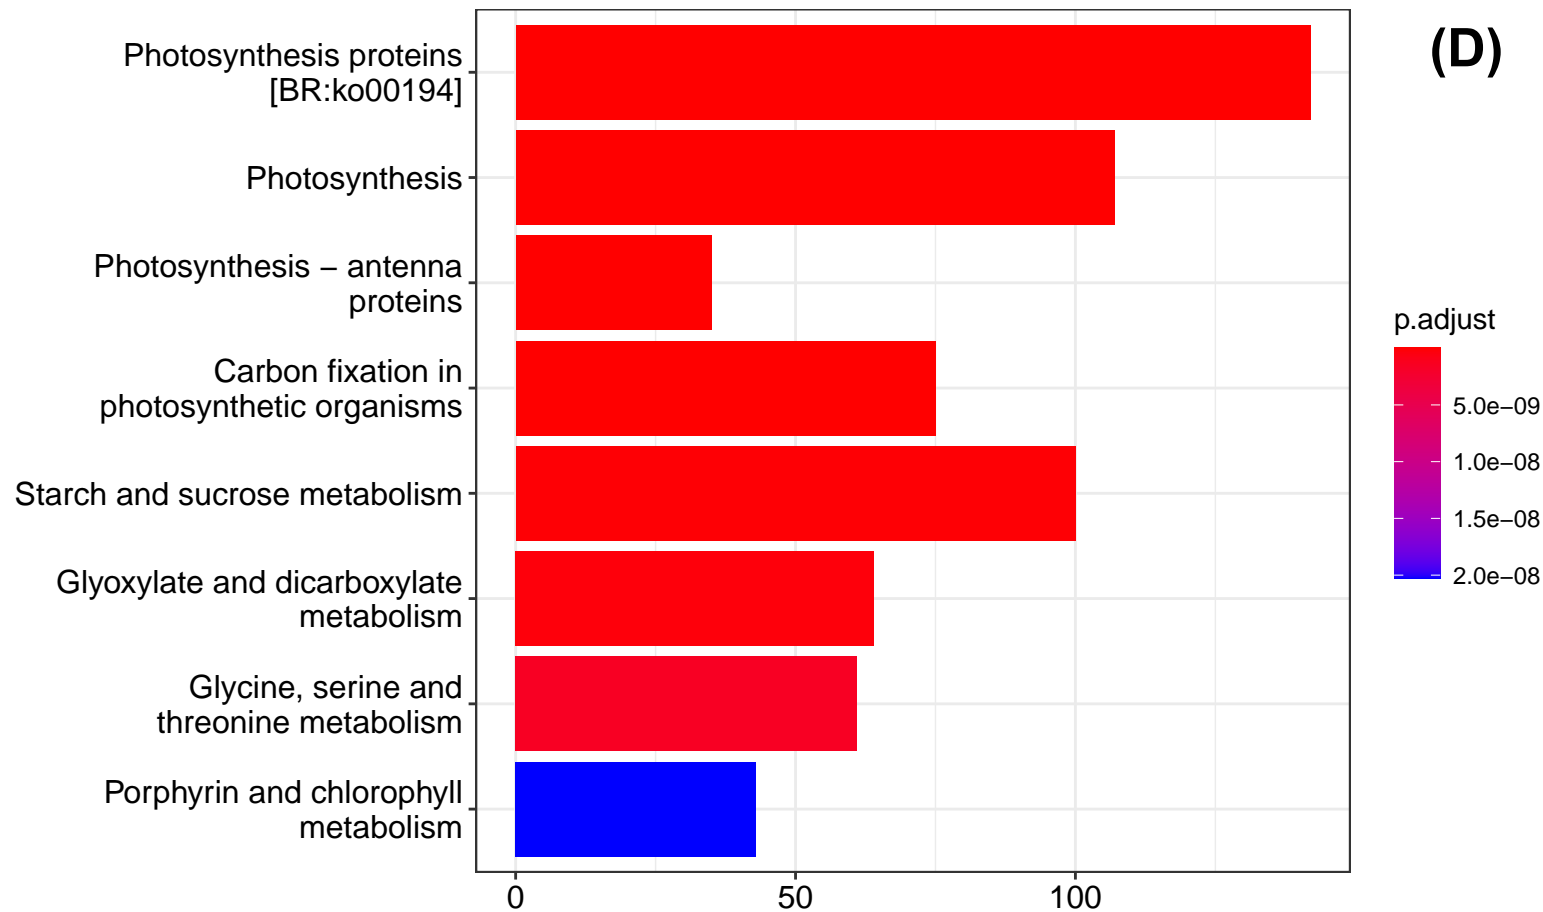

**Figure S5. KEGG enrichment of the DEGs in K58 under different drought stress time. The Y-axis represents the KEGG pathway. The X-axis represent the gene number enriched in each pathway. (A) Up-regulated genes at 7 days of drought stress. (B) Up-regulated genes at 14 days of drought stress. (C) Down-regulated genes at 7 days of drought stress. (D) Down-regulated genes at 14 days of drought stress.**
