# Supplementary material for: Combined GWAS and Transcriptome Analyses Provide New Insights Into the Response Mechanisms of Sunflower Against Drought Stress
Source: Front Plant Sci. 2022 May 3;13:847435. doi: 10.3389/fpls.2022.847435 (PMC9111542; doi:10.3389/fpls.2022.847435)
Supplement: Supplementary file 8 [file Table_2.XLSX]

## Sheet: sheet1
TableS2. Sequencing data statistics and sequencing quality assessment of 226 sunflower accessions
Sample ID	Total Reads	GC Percentage(%)	Q30 Percentage(%)
B2	5028349	43.72	92.93
B3	4888235	43.15	92.39
B5	5669723	43.01	93.42
B6	4993857	43.35	92.65
B8	5243154	43.26	92.95
B9	5420539	43.56	92.61
B10	5121119	43.41	92.24
B11	4724436	43.34	92.18
B12	3656096	43.4	92.22
B94	4391462	43.06	92.78
B14	4472465	42.93	93.28
B17	4240623	42.96	92.64
B18	4397628	42.74	92.31
B19	3859590	42.42	92.85
B20	5607019	42.87	92.37
B83	5458021	43.08	92.71
B24	4116693	42.55	92.56
B25	4230069	42.64	92.56
B26	4477249	42.93	92.83
B31	5419767	42.5	93.21
B32	5770666	42.51	92.55
B33	4394406	42.84	92.83
B35	4433087	42.86	92.96
B36	3655600	42.71	92.44
B37	3102594	42.34	92.87
B38	3384585	42.27	92.89
B39	3678881	42.13	92.79
B40	3481477	42.45	92.55
B41	3001933	42.38	93.12
B42	3355383	42.42	92.36
B73	3731783	42.26	92.39
B71	3759014	42.61	92.58
B45	3647235	42.59	91.98
B46	3200169	42.66	92.14
B47	3800406	42.62	91.79
B62	3214840	42.62	92.57
B51	3318962	42.36	92.71
B52	4332942	42.86	92.97
B53	4063970	42.63	92.8
B55	4025424	42.73	92.71
B56	4414152	42.41	92.92
B57	3668211	43.72	92.64
B58	3559800	43.62	92.6
B60	3540056	43.29	92.72
B61	4203381	43.16	92.11
B59	5157994	42.99	92.15
B63	5076923	43.66	92.83
B64	4683622	43.6	92.23
B65	5118775	43.45	91.72
B66	5605843	43.11	92.38
B67	5353094	43.24	92.38
B68	4605950	43.27	92.34
B69	5013301	42.93	92.79
B70	5619463	43.2	92.28
B72	3210634	44.07	92.76
B54	1988880	43.46	93.07
B74	2772925	43.83	93.14
B75	3031637	43.67	92.63
B76	2925945	43.86	92.56
B77	2199239	43.53	93.29
B78	2570019	43.82	92.55
B79	2886652	43.55	92.97
B80	2974012	43.64	92.32
B81	2986398	43.77	92.99
B82	3306837	43.76	92.88
B84	3079213	43.64	93.1
B85	2727622	44.08	92.98
B86	3690039	43.84	92.51
B87	2474046	43.73	92.93
B88	2490281	44.16	92.17
B89	2965919	43.92	93.44
B90	2683097	43.78	93.26
B91	2952025	43.59	92.95
B92	3055278	43.71	92.68
B93	3600445	43.28	92.53
B49	3968196	43.23	92.17
B95	4111714	42.54	92.87
B96	3937583	43.09	92.72
B97	4422755	42.75	91.74
B98	4364657	42.94	92.47
B99	4465327	42.83	92.08
B100	4385897	43.13	92.02
B101	4521808	43.04	92.36
B102	4291901	42.5	91.38
B103	4123833	43.15	90.38
B104	3903777	42.86	92.14
B105	2874137	42.69	92.03
B107	3805342	42.54	92.39
B108	3374107	42.5	92.15
B48	3524944	43.01	91.78
B44	4272052	43.02	92.46
B43	3718830	43.22	91.78
B34	3676163	43.12	91.9
B28	3913924	43.06	92.23
B23	3621670	42.83	92.02
B22	3540591	42.66	91.91
B130	4111219	42.59	92.1
B13	4397566	42.91	92.16
B129	2385265	42.47	91.84
B128	3724686	43.05	91.08
B131	3984566	42.75	91.62
B1	3515406	43.21	91.43
B127	1329754	42.86	91.97
B126	4717969	43.48	90.79
B125	3629912	42.72	91.83
B124	4027990	42.76	91.79
B123	4188680	43.01	91.44
B122	4041251	42.71	91.49
B121	4108024	42.73	91.92
B120	3608865	42.83	91.38
B119	4073512	42.76	91.72
B118	4077837	42.98	91.1
B117	3893824	43.09	91.22
B116	4106197	43.14	91.75
B115	4028605	42.43	91.33
B114	4455568	43.11	91.62
B113	3339205	42.72	90.98
B112	4672023	42.7	92.03
B111	4253026	42.77	91.48
B110	3527039	42.4	91.85
B109	2829158	43.21	91.21
B106	2949710	42.62	91.56
A1	6600606	45.09	93.23
A2	3927905	44.59	92.85
A3	3230486	45.1	92.44
A4	3384174	44.93	92.94
A5	3547408	44.94	93.13
A6	4246323	44.93	92.44
A7	3425675	45.36	92.82
A8	3357276	45.04	93.31
A9	2850565	45.14	93.28
A11	3723451	44.62	92.97
A12	3709698	45.1	92.59
A13	3669038	44.84	93.07
A14	3767528	45.56	93.32
A15	4078819	45.1	92.83
A16	3908583	45.54	92.61
A17	4165551	45.25	93.23
A18	4121224	45.28	93.32
A19	5027980	44.68	92.94
A20	4734561	44.8	92.41
A21	2463439	45.09	92.26
A22	4200875	44.82	92.4
A23	3843232	44.99	92.89
A24	4041383	44.84	92.14
A25	3661644	44.69	92.19
A26	4473788	44.94	92.46
A27	3696404	44.82	92.74
A28	3251341	44.97	92.35
A29	3394442	44.57	92.4
A31	4045627	45.13	92.46
A32	3456234	45.03	92.84
A33	3064958	44.81	91.78
A34	2914902	44.8	91.87
A35	2095066	44.78	91.87
A36	3042780	45.27	92.3
A37	3088670	44.96	92.36
A38	3691299	44.75	92.48
A39	3602295	45.15	92.86
A40	3518003	44.37	91.78
A41	3894248	44.73	91.8
A42	3255665	44.49	92.36
A43	4041326	44.75	91.71
A44	4039757	44.71	91.96
A46	3996356	44.39	92.41
A47	3144873	44.57	91.41
A48	3633113	44.6	91.57
A49	3656511	44.67	92.06
A50	3274011	44.32	91
D1	4598549	44.04	91.49
D2	4290592	43.99	92.12
D3	2856364	44.32	91.66
D4	3866276	44.09	91.52
D5	3817370	44.12	92.07
D6	3623428	44.51	90.04
D7	3801689	44.29	91.44
D8	3290059	44.46	89.62
D9	3918323	44.21	91.19
D10	4103248	43.67	91.26
D11	3873688	44.19	90.81
D12	3866772	44.23	91.29
D13	3844272	44.63	89.32
D14	4135942	44.37	91.05
D15	5690526	44.01	91.1
D19	4914469	44.16	90.37
D20	5151164	44.38	91.37
D21	5375950	44.86	90.96
D22	5444592	43.84	90.93
D23	5005880	44.47	90.16
D24	4857399	44.41	91.41
D25	3631519	44.49	89.24
D26	4204341	44.68	90.96
D27	4139695	44.48	91.25
D28	3374090	44.59	90.2
D29	4481958	44.02	91.17
D30	4611217	43.86	89.04
D31	5997084	44.18	90.74
D32	5667630	44.04	91.11
C1	5410956	44.48	90.39
C2	8955227	44	89.72
C3	8833456	43.54	90.1
C5	9370473	44.01	89.39
C6	11906168	43.73	90.7
C7	8558887	43.45	89.77
C8	7754969	43.38	89.99
C9	6387874	43.34	89.28
C10	4034382	43.97	91.01
C11	4087770	42.91	90.14
C12	4807372	44.3	90.3
C14	4271846	43.48	89.35
C15	4756061	43.75	90.84
C16	4265575	43.93	89.83
C17	4306988	43.87	90.04
C19	4554386	43.88	89.37
C21	4388708	44.01	90.6
C23	4264357	43.97	89.78
A30	3887166	44.15	90.01
A45	3803009	43.92	89.24
D17	3064252	43.81	90.51
D33	4815740	43.57	92.76
D34	5236830	43.67	93.22
C4	4238196	42.83	92.77
C13	5104611	43.58	92.96
C18	4772767	43.84	92.62
C20	5615730	44.01	92.93
C22	4483244	43.87	92.82
SD	937364	46.21	91.96
