# Supplementary material for: Combined GWAS and Transcriptome Analyses Provide New Insights Into the Response Mechanisms of Sunflower Against Drought Stress
Source: Front Plant Sci. 2022 May 3;13:847435. doi: 10.3389/fpls.2022.847435 (PMC9111542; doi:10.3389/fpls.2022.847435)
Supplement: Supplementary file 11 [file Table_5.XLSX]

## Sheet: Data statistics of SNPs for 226
Table S5. Data statistics of all SNPs for 226 sunflower accession
Sample ID	Total SNP	SNP num	Integrity	Heter ratio
B2	2124143	672757	0.3167	0.0387
B3	2124143	655797	0.3087	0.0434
B5	2124143	663769	0.3125	0.0386
B6	2124143	632655	0.2978	0.0387
B8	2124143	668235	0.3146	0.0514
B9	2124143	666419	0.3137	0.0397
B10	2124143	688900	0.3243	0.0405
B11	2124143	661319	0.3113	0.0397
B12	2124143	682413	0.3213	0.0427
B94	2124143	633058	0.298	0.0329
B14	2124143	624301	0.2939	0.0419
B17	2124143	619636	0.2917	0.0419
B18	2124143	627451	0.2954	0.0528
B19	2124143	574402	0.2704	0.0437
B20	2124143	661712	0.3115	0.0459
B83	2124143	652401	0.3071	0.0436
B24	2124143	550929	0.2594	0.0404
B25	2124143	546488	0.2573	0.04
B26	2124143	625837	0.2946	0.0736
B31	2124143	628449	0.2959	0.033
B32	2124143	634688	0.2988	0.041
B33	2124143	587064	0.2764	0.0397
B35	2124143	605958	0.2853	0.0336
B36	2124143	531276	0.2501	0.0297
B37	2124143	512915	0.2415	0.0319
B38	2124143	510680	0.2404	0.0326
B39	2124143	532964	0.2509	0.0334
B40	2124143	546063	0.2571	0.0396
B41	2124143	478338	0.2252	0.0273
B42	2124143	515489	0.2427	0.0285
B73	2124143	549326	0.2586	0.0294
B71	2124143	553897	0.2608	0.0323
B45	2124143	558826	0.2631	0.0361
B46	2124143	525004	0.2472	0.035
B47	2124143	554257	0.2609	0.0382
B62	2124143	518030	0.2439	0.0283
B51	2124143	504398	0.2375	0.0384
B52	2124143	636504	0.2997	0.0387
B53	2124143	567618	0.2672	0.0341
B55	2124143	612082	0.2882	0.0433
B56	2124143	602388	0.2836	0.0409
B57	2124143	667521	0.3143	0.0459
B58	2124143	672468	0.3166	0.0377
B60	2124143	648316	0.3052	0.0359
B61	2124143	639112	0.3009	0.0305
B59	2124143	695624	0.3275	0.0387
B63	2124143	723270	0.3405	0.0359
B64	2124143	725719	0.3417	0.0389
B65	2124143	694135	0.3268	0.0373
B66	2124143	707678	0.3332	0.0381
B67	2124143	736614	0.3468	0.0391
B68	2124143	707767	0.3332	0.0387
B69	2124143	686307	0.3231	0.035
B70	2124143	736738	0.3468	0.0354
B72	2124143	589183	0.2774	0.0338
B54	2124143	494780	0.2329	0.0353
B74	2124143	650623	0.3063	0.0357
B75	2124143	647157	0.3047	0.0358
B76	2124143	653840	0.3078	0.0354
B77	2124143	629072	0.2962	0.0379
B78	2124143	603292	0.284	0.0357
B79	2124143	608922	0.2867	0.0394
B80	2124143	651636	0.3068	0.0406
B81	2124143	695451	0.3274	0.0436
B82	2124143	663603	0.3124	0.0391
B84	2124143	641967	0.3022	0.036
B85	2124143	556037	0.2618	0.0355
B86	2124143	690745	0.3252	0.0376
B87	2124143	607214	0.2859	0.0368
B88	2124143	514923	0.2424	0.0334
B89	2124143	696983	0.3281	0.075
B90	2124143	668165	0.3146	0.0375
B91	2124143	685553	0.3227	0.0392
B92	2124143	690174	0.3249	0.0421
B93	2124143	667780	0.3144	0.0346
B49	2124143	588389	0.277	0.031
B95	2124143	603232	0.284	0.0398
B96	2124143	609005	0.2867	0.0387
B97	2124143	627450	0.2954	0.0351
B98	2124143	611789	0.288	0.0345
B99	2124143	609623	0.287	0.0316
B100	2124143	632915	0.298	0.0354
B101	2124143	621686	0.2927	0.035
B102	2124143	578574	0.2724	0.0354
B103	2124143	588665	0.2771	0.0356
B104	2124143	618445	0.2912	0.0418
B105	2124143	539000	0.2537	0.0326
B107	2124143	594870	0.2801	0.039
B108	2124143	558100	0.2627	0.032
B48	2124143	562349	0.2647	0.0396
B44	2124143	610967	0.2876	0.0326
B43	2124143	603725	0.2842	0.0342
B34	2124143	583860	0.2749	0.0358
B28	2124143	580475	0.2733	0.0346
B23	2124143	586020	0.2759	0.0406
B22	2124143	550186	0.259	0.0395
B130	2124143	615209	0.2896	0.0351
B13	2124143	613993	0.2891	0.0371
B129	2124143	488025	0.2298	0.0287
B128	2124143	577076	0.2717	0.062
B131	2124143	579840	0.273	0.0306
B1	2124143	573226	0.2699	0.0392
B127	2124143	360508	0.1697	0.0275
B126	2124143	619040	0.2914	0.0386
B125	2124143	543196	0.2557	0.0377
B124	2124143	594097	0.2797	0.0373
B123	2124143	609568	0.287	0.0357
B122	2124143	601789	0.2833	0.0336
B121	2124143	605004	0.2848	0.0365
B120	2124143	556105	0.2618	0.0293
B119	2124143	619885	0.2918	0.0458
B118	2124143	604790	0.2847	0.0372
B117	2124143	591148	0.2783	0.0359
B116	2124143	611611	0.2879	0.0601
B115	2124143	554636	0.2611	0.0353
B114	2124143	577662	0.272	0.0377
B113	2124143	521862	0.2457	0.0319
B112	2124143	597972	0.2815	0.0393
B111	2124143	565175	0.2661	0.0345
B110	2124143	531364	0.2502	0.0362
B109	2124143	508242	0.2393	0.03
B106	2124143	545492	0.2568	0.039
A1	2124143	1118118	0.5264	0.0605
A2	2124143	882287	0.4154	0.0478
A3	2124143	832330	0.3918	0.0496
A4	2124143	803383	0.3782	0.0439
A5	2124143	850568	0.4004	0.0502
A6	2124143	680988	0.3206	0.0431
A7	2124143	816688	0.3845	0.0549
A8	2124143	818952	0.3855	0.0558
A9	2124143	653571	0.3077	0.0395
A11	2124143	823087	0.3875	0.0387
A12	2124143	829141	0.3903	0.0449
A13	2124143	854015	0.4021	0.0443
A14	2124143	843361	0.397	0.0467
A15	2124143	858159	0.404	0.0475
A16	2124143	901101	0.4242	0.0516
A17	2124143	878323	0.4135	0.0444
A18	2124143	863999	0.4068	0.0531
A19	2124143	933640	0.4395	0.0568
A20	2124143	959525	0.4517	0.061
A21	2124143	647747	0.3049	0.0372
A22	2124143	846110	0.3983	0.0474
A23	2124143	928871	0.4373	0.0937
A24	2124143	900727	0.424	0.0564
A25	2124143	817680	0.3849	0.0496
A26	2124143	905406	0.4262	0.0586
A27	2124143	879684	0.4141	0.083
A28	2124143	780281	0.3673	0.0466
A29	2124143	866013	0.4077	0.0532
A31	2124143	848374	0.3994	0.0532
A32	2124143	867802	0.4085	0.0895
A33	2124143	755445	0.3556	0.0467
A34	2124143	784970	0.3695	0.0583
A35	2124143	599400	0.2822	0.0314
A36	2124143	801860	0.3775	0.0575
A37	2124143	791690	0.3727	0.0421
A38	2124143	844601	0.3976	0.0429
A39	2124143	850375	0.4003	0.0491
A40	2124143	738798	0.3478	0.0459
A41	2124143	686953	0.3234	0.0333
A42	2124143	597108	0.2811	0.0276
A43	2124143	688483	0.3241	0.0323
A44	2124143	719751	0.3388	0.0413
A46	2124143	720471	0.3392	0.0353
A47	2124143	591866	0.2786	0.0366
A48	2124143	616311	0.2901	0.0315
A49	2124143	551034	0.2594	0.0365
A50	2124143	544864	0.2565	0.0386
D1	2124143	802388	0.3777	0.0405
D2	2124143	785198	0.3697	0.0391
D3	2124143	799702	0.3765	0.0494
D4	2124143	809858	0.3813	0.0473
D5	2124143	727855	0.3427	0.0297
D6	2124143	710514	0.3345	0.042
D7	2124143	741829	0.3492	0.038
D8	2124143	769291	0.3622	0.0791
D9	2124143	892180	0.42	0.0512
D10	2124143	778010	0.3663	0.0394
D11	2124143	905297	0.4262	0.0928
D12	2124143	747012	0.3517	0.0683
D13	2124143	753130	0.3546	0.067
D14	2124143	868070	0.4087	0.0574
D15	2124143	845862	0.3982	0.051
D19	2124143	874131	0.4115	0.0981
D20	2124143	912386	0.4295	0.0645
D21	2124143	959688	0.4518	0.0725
D22	2124143	817140	0.3847	0.0644
D23	2124143	758744	0.3572	0.0582
D24	2124143	891917	0.4199	0.0701
D25	2124143	762475	0.359	0.0586
D26	2124143	901444	0.4244	0.0865
D27	2124143	871895	0.4105	0.063
D28	2124143	695896	0.3276	0.0444
D29	2124143	665674	0.3134	0.0514
D30	2124143	673936	0.3173	0.0533
D31	2124143	839467	0.3952	0.0683
D32	2124143	839911	0.3954	0.0796
C1	2124143	826187	0.389	0.0578
C2	2124143	947491	0.4461	0.0902
C3	2124143	849192	0.3998	0.0648
C5	2124143	816603	0.3844	0.0614
C6	2124143	976651	0.4598	0.0923
C7	2124143	842285	0.3965	0.0503
C8	2124143	686810	0.3233	0.0468
C9	2124143	632403	0.2977	0.0451
C10	2124143	555302	0.2614	0.0551
C11	2124143	567837	0.2673	0.0425
C12	2124143	605266	0.2849	0.0615
C14	2124143	555308	0.2614	0.0402
C15	2124143	656687	0.3092	0.0377
C16	2124143	627819	0.2956	0.0356
C17	2124143	578665	0.2724	0.0336
C19	2124143	555658	0.2616	0.0438
C21	2124143	597189	0.2811	0.037
C23	2124143	620689	0.2922	0.0385
A30	2124143	575082	0.2707	0.0445
A45	2124143	536566	0.2526	0.0344
D17	2124143	477790	0.2249	0.0316
D33	2124143	586763	0.2762	0.0364
D34	2124143	703982	0.3314	0.0408
C4	2124143	544902	0.2565	0.0501
C13	2124143	675190	0.3179	0.041
C18	2124143	621819	0.2927	0.0364
C20	2124143	666168	0.3136	0.0452
C22	2124143	649992	0.306	0.0406
