# Supplementary material for: Combined GWAS and Transcriptome Analyses Provide New Insights Into the Response Mechanisms of Sunflower Against Drought Stress
Source: Front Plant Sci. 2022 May 3;13:847435. doi: 10.3389/fpls.2022.847435 (PMC9111542; doi:10.3389/fpls.2022.847435)
Supplement: Supplementary file 15 [file Table_9.XLSX]

## Sheet: sheet1
Table S9. Detail information of candidate genes highly associated with 8 traits of drought tolerance in sunflower and homologous genes in Arabidopsis thaliana
Traits	Gene name	Chromosome	Gene_start	Gene_end	SNP_location	Distance	COG_category	Description	Pfam	A. thaliana gene Alias	Itak	Families
(PH/LSA)-STI	LOC110899235	13	138759411	138769673	S13_138780042	-10.369	F	inosine-uridine preferring nucleoside hydrolase		AT5G18860.2
	LOC110899237	13	138777830	138786700	S13_138780042	inner	S	Broad-Complex, Tramtrack and Bric a brac		AT4G15840.1	TR	TRAF
	LOC110899238	13	138795923	138801286	S13_138780042	15.881	Q	ABC transporter C family member 3-like		AT3G13080.1
	LOC110911504	15	52587113	52593558	S15_52600184	-6.626	K	import inner membrane translocase subunit		AT1G55900.1
	LOC110911505	15	52596099	52598163	S15_52600184	-2.021	I	Belongs to the class I-like SAM-binding methyltransferase superfamily. Erg6 SMT family		AT1G20330.1
	LOC110911507	15	52600495	52605186	S15_52600184	0.311
PH-SSI	LOC110876609	9	172041344	172044184	S9_172054475	-10.291	KL	ribonuclease H protein At1g65750	Reverse transcriptase (RNA-dependent DNA
	LOC110879220	9	172050868	172054310	S9_172054475	-0.165
	LOC110916153	16	81128987	81147655	S16_81126535	2.452	T	Carbohydrate-binding protein of the ER	Protein kinase domain	AT3G46290.1	PK	RLK-Pelle_CrRLK1L-1
PH-STI	LOC110885292	10	125951031	125957530	S10_125972816	-15.286	PT	Two pore calcium channel protein		AT4G03560.1
(LSA/SPAD)-(SSI/STI)	LOC110885273	10	123870286	123873341	S10_123892851	-19.51	T	Serine threonine-protein kinase		AT4G32300.1	PK	RLK-Pelle_SD-2b
LSA-SSI	LOC110894816	12	55570908	55573165	S12_55591694	-18.529	F	Equilibrative nucleotide transporter	Nucleoside transporter	AT1G70330.1
	LOC110894817	12	55586965	55597302	S12_55591694	inner	S	methyl-CpG-binding domain-containing protein	PHD-finger	AT3G01460.1	TR	PHD
	LOC110919835	16	130596673	130597452	S16_130594820	1.853
	LOC110915784	16	130612833	130618764	S16_130594820	18.013	S	Transposase family tnp2	Transposase family tnp2
LSA-STI	LOC110930653	3	155461434	155477935	S3_155462096	inner
	LOC110933449	4	75250971	75252964	S4_75246018	4.953	O	regulation of protein catabolic process		AT5G41220.2
	LOC110936334	4	60470023	60472767	S4_60483094	-10.327	T	Jacalin-like lectin domain		AT1G73040.1
	LOC110944005	5	200312620	200313525	S5_200328126	-14.601
	LOC110941963	5	200316650	200319863	S5_200328126	-8.263	Z	Microtubule-associated protein RP EB family member	EB1-like C-terminal motif	AT3G47690.1
	LOC110944006	5	200322138	200323202	S5_200328126	-4.924	S	F-Box protein		AT5G41500.1
	LOC110941964	5	200323600	200326454	S5_200328126	-1.672	K	Transcription factor bHLH47-like		AT3G47640.1
	LOC110941965	5	200328751	200332692	S5_200328126	0.625				AT1G74530.3
	LOC110944007	5	200346606	200347805	S5_200328126	18.48
	LOC110941936	5	199019701	199031355	S5_199045672	-14.317				AT3G48770.1
	LOC110939787	5	12852048	12858254	S5_12849901	2.147	S	Male gamete fusion factor		AT4G11720.1
	LOC110942543	5	12863479	12864402	S5_12849901	13.578	E	Uncharacterized protein K02A2.6-like
	LOC110942544	5	12869253	12870635	S5_12849901	19.352
	LOC110942539	5	12757068	12758254	S5_12758840	-0.586	L	Reverse transcriptase (RNA-dependent DNA polymerase)		AT4G23160.2
	LOC110942540	5	12770896	12771354	S5_12758840	12.056	L	cysteine-rich RLK (RECEPTOR-like protein kinase) 8		AT1G21280.1
	LOC110942541	5	12775591	12776169	S5_12758840	16.751
	LOC110942538	5	12695083	12695634	S5_12683159	11.924
	LOC110939782	5	12633371	12636629	S5_12618693	14.678	L	Helix-hairpin-helix class 2 (Pol1 family) motifs		AT3G28030.1
	LOC110944527	6	25168722	25169315	S6_25184260	-14.945
	LOC110864999	6	25200145	25206740	S6_25184260	15.885	S	RCD1-SRO-TAF4 (RST) plant domain		AT1G32230.3
	LOC110891368	11	160097535	160104398	S11_160090021	7.514	T	receptor-like protein kinase	Protein tyrosine and serine/threonine kin	AT3G46290.1	PK	RLK-Pelle_CrRLK1L-1
	LOC110891369	11	160106964	160111888	S11_160090021	16.943	T	receptor-like protein kinase	Protein tyrosine and serine/threonine kin	AT3G46290.1	PK	RLK-Pelle_CrRLK1L-1
	LOC110913628	15	50952010	50952537	S15_50965520	-12.983	S	Domain of unknown function (DUF4228)	Domain of unknown function (DUF4228)	AT3G03280.1
	LOC110913388	15	28302432	28304843	S15_28314129	-9.286	L	Uncharacterized protein K02A2.6-like		AT3G01410.1
	LOC110920644	17	8881157	8883452	S17_8886925	-3.473	S	PLATZ transcription factor	PLATZ transcription factor	AT4G17900.1	TF	PLATZ
RSR-SSI	LOC110928886	1	12616119	12622321	S1_12599416	16.703	H	transposition, RNA-mediated	Zinc knuckle
	LOC110934182	4	169916155	169916550	S4_169935722	-19.172				AT5G27020.1
	LOC110937937	4	169924932	169927583	S4_169935722	-8.139	M	Component of the peroxisomal and mitochondrial division machineries. Plays a role in promoting the fission of mitochondria and peroxisomes	Fis1 C-terminal tetratricopeptide repeat	AT3G57090.1
	LOC110937938	4	169933813	169939455	S4_169935722	inner	S	SAWADEE domain	SAWADEE domain	AT3G18380.1
	LOC110937939	4	169941009	169944616	S4_169935722	5.287	S	Oligosaccaryltransferase	Oligosaccaryltransferase	AT3G09455.2
	LOC110915715	16	39633096	39638580	S16_39635654	inner	S	Protein of unknown function (DUF1666)	Protein of unknown function (DUF1666)	AT1G73850.2
	LOC110924457	17	91431485	91432678	S17_91437754	-5.076	KLT	protein kinase activity
RSR-STI	LOC110929581	3	104816464	104818476	S3_104825478	-7.002
	LOC110934225	4	176206229	176207654	S4_176227034	-19.38
	LOC110938165	4	176209747	176210954	S4_176227034	-16.08
	LOC110935340	4	176218744	176219737	S4_176227034	-7.297
	LOC110938166	4	176221113	176222672	S4_176227034	-4.362
	LOC110923810	17	24891569	24892387	S17_24879884	11.685
RV-STI	LOC110877324	9	29925998	29927713	S9_29943689	-15.976	CG	Belongs to the UDP-glycosyltransferase family		AT2G18570.1
	LOC110917707	16	74795170	74799439	S16_74802984	-3.545	U	Domain present in VPS-27, Hrs and STAM		AT2G38410.1
	LOC110919385	16	74809433	74810338	S16_74802984	6.449	S	Domain of unknown function (DUF4283)		AT2G01050.1
RSA-STI	LOC110897235	2	139308638	139312837	S2_139329011	-16.174	KL	ribonuclease H protein At1g65750		AT3G24255.7
	LOC110923164	2	139339158	139340312	S2_139329011	10.147	S	ZINC FINGER protein		AT5G10970.1	TF	C2H2
	LOC110872899	8	68366663	68376805	S8_68352115	14.548	T	Inactive leucine-rich repeat receptor-like serine threonine-protein kinase	Protein kinase domain	AT1G10850.1	PK	RLK-Pelle_LRR-III
RWC-SSI	LOC110941861	5	195712167	195719116	S5_195713371	inner	S	Mediator of RNA polymerase II transcription subunit	Vitamin-D-receptor interacting Mediator s	AT5G02850.1
	LOC110941862	5	195719872	195730082	S5_195713371	6.501	S	Topless-related protein	WD domain, G-beta repeat	AT1G15750.3
	LOC110873668	8	129422863	129423945	S8_129404195	18.668	O	Mitogen-activated protein kinase kinase kinase	Ring finger domain	AT5G11620.2
RWC-STI	LOC110934742	4	89773130	89773429	S4_89788487	-15.058	O	Glutaredoxin	Glutaredoxin	AT3G62950.1
	LOC110937589	4	157203875	157213629	S4_157205731	--7.898	U	exocyst complex component	Exocyst complex component Sec10	AT5G12370.2
	LOC110934058	4	157216041	157216574	S4_157205731	10.31	S	Ribosomal protein-like protein	Plant transposon protein	AT2G13770.1
	LOC110896553	12	36970542	36973143	S12_36961686	8.856	O	In Between Ring fingers	Reverse transcriptase-like	AT5G60250.1
SPAD-STI	LOC110885441	2	9015434	9020877	S2_9022450	-1.573	S	Protein of unknown function (DUF632)	Protein of unknown function (DUF632)	AT5G25590.1
	LOC110909729	2	9022167	9032225	S2_9022450	inner	S	Methyltransferase-like protein	Lysine methyltransferase	AT1G79915.1
	LOC110909766	2	9036048	9041592	S2_9022450	13.598	Z	Regulator of Vps4 activity in the MVB pathway	Regulator of Vps4 activity in the MVB pat	AT1G79910.1
	LOC110943049	5	80453734	80472417	S5_80443900	9.834	L	zinc finger	GAG-pre-integrase domain	ATMG00300.1
	LOC110888913	11	157852259	157853737	S11_157851940	0.319	CG	UDP-glucoronosyl and UDP-glucosyl transferase	UDP-glucoronosyl and UDP-glucosyl transfe	AT2G36780.1
	LOC110888914	11	157853980	157855874	S11_157851940	2.04	S	protein FAR1-RELATED SEQUENCE
	LOC110888915	11	157855875	157856561	S11_157851940	3.935	S	protein FAR1-RELATED SEQUENCE	MULE transposase domain	AT4G38180.1
	LOC110888916	11	157868245	157872297	S11_157851940	16.305	CG	UDP-glucoronosyl and UDP-glucosyl transferase		AT2G36780.1
	LOC110892402	12	14235600	14236305	S12_14238740	-2.435
	LOC110894035	12	14243555	14249467	S12_14238740	4.815	S	Protein kinase C conserved region 1 (C1) domains (Cysteine-rich domains)	C1 domain	AT5G42280.2
	LOC110894036	12	14254681	14261693	S12_14238740	15.941	S	C1 domain	C1 domain	AT2G17600.1
	LOC110906319	14	174066105	174067325	S14_174060305	5.8				AT5G24130.1
	LOC110905162	14	174067444	174071311	S14_174060305	7.139	U	Belongs to the syntaxin family	Syntaxin 6, N-terminal	AT1G28490.1
	LOC110905163	14	174072801	174078612	S14_174060305	12.496	O	Peptidase family M41	Peptidase family M41	AT5G53170.1
	LOC110907907	14	174078721	174080199	S14_174060305	18.416	S	Plant transposon protein		AT2G13770.1
	LOC110910937	15	27091391	27095244	S15_27112881	-17.637	S	oberon 3	Coiled-coil region of Oberon	AT1G14740.1
	LOC110913370	15	27096058	27097884	S15_27112881	-14.997	L	Reverse transcriptase (RNA-dependent DNA polymerase)	Retroviral aspartyl protease	AT3G29750.1
	LOC110910938	15	27103794	27109257	S15_27112881	-3.624	S	oberon 3	Coiled-coil region of Oberon	AT1G14740.1
	LOC110913371	15	27116873	27118378	S15_27112881	3.992	L	Uncharacterized protein K02A2.6-like	Reverse transcriptase-like	AT3G01410.1
*: + indicates the gene was locate at down-stream of the significant SNP and - indicates the gene was locate at up-stream of the significant SNP, inner indicates the gene was contained the siginicant SNP.
